# Supplementary material for: Self-care interventions of community-dwelling older adults: a systematic review and meta-analysis
Source: Frontiers journal article supplement (doi:10.3389/fpubh.2023.1254172), 2023-10-09
Supplement: Data_Sheet_1.PDF [file Data_Sheet_1.PDF]

## Supplementary Material

### 1 Supplementary Material A.

**Table 1.** Characteristics of the self-care interventions for healthy older adults.

| Study | Purpose         | Contents                                                                                                                                                                                                                                                                                        | Measurement                                                                                                                                                                                                                                                                                                                 |
|-------|-----------------|-------------------------------------------------------------------------------------------------------------------------------------------------------------------------------------------------------------------------------------------------------------------------------------------------|-----------------------------------------------------------------------------------------------------------------------------------------------------------------------------------------------------------------------------------------------------------------------------------------------------------------------------|
| 18    | Supportive Care | Promoting physical and mental health<br>Environmental, psychosocial, physiological and health-related behavioural problems<br>Goals of the care plan                                                                                                                                            | Geriatric Depression Scale<br>Life satisfaction<br>Short Form Health Survey, version 2.                                                                                                                                                                                                                                     |
| 19    | Supportive Care | Mastery experience<br>Vicarious experience<br>Social and verbal persuasion<br>Physiological and affective states<br>Problem classification scheme<br>Intervention scheme<br>Problem ration scale for outcomes<br>Routines<br>Information systems<br>Meeting<br>Boundary spanner                 | Chinese version Mini-Mental Status Examination<br>The General Self-efficacy Scale<br>QoL (12-item)<br>Short Form Health Survey version 2—Chinese (HK)<br>Modified Barthel Index—Chinese version<br>The Lawton Instrumental Activities of Daily Living scale - Chinese version<br>Adherence to Refills and Medications Scale |
| 20    | Prevention      | Physical and cognitive activities<br>Tai Chi-inspired exercises<br>Dancing<br>Step-based cognitive games                                                                                                                                                                                        | Accelerometer and gyroscope assessments<br>Short Physical Performance Battery (SPPB)<br>Senior Fitness Test (SFT)<br>Victoria Stroop Test (VST)<br>Trail Making Test (TMT)<br>Wechsler Memory Scale-Revised<br>MRI (Image) Acquisition                                                                                      |
| 21    | Supportive Care | Engage and empower to take action on preventing diseases<br>Maintaining and promoting health and functioning<br>Resolve their health and social problems proactively<br>Building up their self-care confidence<br>Providing referral services to other health care disciplines in the community | Health service utilization (Number of public GP visits, Number of private GP visits, Number of A&E admissions, Number of in-patient admissions, Total length of stay in hospital)<br>The 12-item Short-Form Health Survey (SF-12 HK)                                                                                        |

|    |            |                                                                                                                                                                                                  |                                                                                                                                                                                                                                                                                                                                                                                                                                                                                                                                                                    |
|----|------------|--------------------------------------------------------------------------------------------------------------------------------------------------------------------------------------------------|--------------------------------------------------------------------------------------------------------------------------------------------------------------------------------------------------------------------------------------------------------------------------------------------------------------------------------------------------------------------------------------------------------------------------------------------------------------------------------------------------------------------------------------------------------------------|
| 22 | Prevention | Physical activity<br>Productivity<br>Social connection<br>Medical<br>Maintenance of health<br>Diet and nutrition<br>Rehabilitation<br>Mental health<br>Smoking and use of alcohol<br>Other goals | 10-item DSSI<br>Zarit Burden Interview<br>International Physical Activity<br>Questionnaire (IPAQ)<br>General Self-Efficacy Scale (GSE)<br>EQ-5D                                                                                                                                                                                                                                                                                                                                                                                                                    |
| 23 | -          | Concept of ageing<br>Healthy eating<br>Physical activity<br>Stress management<br>Taking responsibility for one's health<br>Interpersonal relationship<br>Spiritual growth<br>Exercise program    | Participant's socio-demographic information<br>Health Promoting Lifestyle Profile II (HPLP II)                                                                                                                                                                                                                                                                                                                                                                                                                                                                     |
| 24 | Prevention | Goals and needs<br>Resources<br>Personal qualities<br>Enabling<br>Group work skills                                                                                                              | 36 Item Short Form Health Survey (SF-36)<br>Patient Health Questionnaire (PHQ)<br>EQ-5D-3 L<br>de Jong Gierveld Loneliness Scale<br>General Self-Efficacy Scale (GSE)<br>Office for National Statistics (ONS) well-being<br>Serious adverse events (SAEs)<br>All health and social care use<br>Health Literacy Scale (HLS)-14<br>Food intake<br>Life-Space Assessment<br>Lubben Social Network Scale<br>Geriatric Depression Scale<br>Portable grip strength dynamometer<br>5-m walking test<br>Triaxial accelerometer<br>Demographic and Clinical Characteristics |
| 25 | Prevention | Exercise<br>Diet/nutrition<br>Cognitive activity to promote the health                                                                                                                           |                                                                                                                                                                                                                                                                                                                                                                                                                                                                                                                                                                    |

---

## 2 Supplementary Material B.

| Pubmed queries |                                                                                                                                                                                                                                                                                                                                                                                                                                                                                                                                                                                                                                    |             |
|----------------|------------------------------------------------------------------------------------------------------------------------------------------------------------------------------------------------------------------------------------------------------------------------------------------------------------------------------------------------------------------------------------------------------------------------------------------------------------------------------------------------------------------------------------------------------------------------------------------------------------------------------------|-------------|
| Search         | Query                                                                                                                                                                                                                                                                                                                                                                                                                                                                                                                                                                                                                              | Items found |
| #4             | ((("care"[All Fields] OR "take care"[All Fields] OR ("self care"[MeSH Terms] OR ("self"[All Fields] AND "care"[All Fields])) OR "self care"[All Fields] OR "selfcare"[All Fields]) OR "care of the self"[All Fields] OR ("care s"[All Fields] OR "cared"[All Fields] OR "carefulness"[All Fields] OR "cares"[All Fields] OR "empathy"[MeSH Terms] OR "empathy"[All Fields] OR "caring"[All Fields])) AND ("healthy ageing"[All Fields] OR "healthy aging"[All Fields]) AND ("older age"[All Fields] OR "older adults"[All Fields] OR "older people"[All Fields])) AND ((english[Filter] OR spanish[Filter]) AND (2016:2021[pdat])) | 838         |
| #3             | ((("self-care"[Title] OR "care"[Title]) AND "healthy"[Title] AND ("aging"[Title] OR "old age"[Title] OR "older adults"[Title])) AND ((english[Filter] OR spanish[Filter]) AND (2016:2021[pdat]))                                                                                                                                                                                                                                                                                                                                                                                                                                   | 10          |
| #2             | ((("Self-care"[All Fields] OR "care"[All Fields]) AND "healthy"[All Fields] AND "older people"[All Fields]) AND ((english[Filter] OR spanish[Filter]) AND (2016:2021[pdat]))                                                                                                                                                                                                                                                                                                                                                                                                                                                       | 627         |
| #1             | ((care[Title/Abstract] OR "take care"[Title/Abstract] OR selfcare [Title/Abstract] OR "care of the self" [Title/Abstract] OR "be cared for"[Title/Abstract]) AND ("healthy ageing"[Title/Abstract] OR "healthy aging"[Title/Abstract])) AND ("older age") AND ((english[Filter] OR spanish[Filter]) AND (2016:2021[pdat]))                                                                                                                                                                                                                                                                                                         | 261         |
| WoS queries    |                                                                                                                                                                                                                                                                                                                                                                                                                                                                                                                                                                                                                                    |             |
| Search         | Query                                                                                                                                                                                                                                                                                                                                                                                                                                                                                                                                                                                                                              | Items found |
| #6             | ALL=((care OR “take care” OR selfcare OR “care of the self” OR “be cared for”) AND (“healthy ageing” OR “healthy                                                                                                                                                                                                                                                                                                                                                                                                                                                                                                                   | 874         |

|    |                                                                                                                                                                                                                        |      |
|----|------------------------------------------------------------------------------------------------------------------------------------------------------------------------------------------------------------------------|------|
|    | aging”) AND (“older age” OR “older adults” OR “older people”))                                                                                                                                                         |      |
| #5 | ALL=((care OR selfcare ) AND healthy AND (“old age” OR “older adults” OR aging))                                                                                                                                       | 4235 |
| #4 | ALL=((care OR “take care” OR selfcare OR “care of the self” OR “be cared for”) AND (“healthy ageing” OR “healthy aging”) AND (“older age” OR “older adults” OR “older people”) AND (intervention OR "RCT"))            | 5642 |
| #3 | TS=((care OR “take care” OR selfcare OR “care of the self” OR “be cared for”) AND (“healthy ageing” OR “healthy aging”) AND (“older age” OR “older adults” OR “older people”) AND (intervention OR "RCT") NOT disease) | 89   |
| #2 | TS=((care OR “take care” OR selfcare OR “care of the self” OR “be cared for”) AND (“healthy ageing” OR “healthy aging”) AND (“older age” OR “older adults” OR “older people”) AND (intervention OR "RCT"))             | 181  |
| #1 | ((TS=(care OR “take care” OR selfcare OR “care of the self” OR “be cared for”)) AND TS=(“healthy ageing” OR “healthy aging”)) AND TS=(“older age” OR “older adults” OR “older people”))                                | 667  |

### Scopus queries

| Search | Query                                                                                                                                                                                                                                                                                                                                                                                                                                                                         | Items found |
|--------|-------------------------------------------------------------------------------------------------------------------------------------------------------------------------------------------------------------------------------------------------------------------------------------------------------------------------------------------------------------------------------------------------------------------------------------------------------------------------------|-------------|
| #8     | ( ALL ( care OR "take care" OR selfcare OR "care of the self" OR "be cared for" ) AND ALL ( "healthy ageing" OR "healthy aging" ) AND ALL ( "older age" OR "older adults" OR "older people" ) ) AND ( LIMIT-TO ( PUBYEAR , 2021 ) OR LIMIT-TO ( PUBYEAR , 2020 ) OR LIMIT-TO ( PUBYEAR , 2019 ) OR LIMIT-TO ( PUBYEAR , 2018 ) OR LIMIT-TO ( PUBYEAR , 2017 ) OR LIMIT-TO ( PUBYEAR , 2016 ) ) AND ( LIMIT-TO ( LANGUAGE , "English" ) OR LIMIT-TO ( LANGUAGE , "Spanish" ) ) | 14496       |
| #7     | ( ALL ( care OR "take care" OR selfcare OR "care of the self" OR "be cared for" ) AND ALL ( "healthy ageing" OR "healthy                                                                                                                                                                                                                                                                                                                                                      | 9126        |

|    |                                                                                                                                                                                                                                                                                                                                                                                                                                                                                                                                                    |      |
|----|----------------------------------------------------------------------------------------------------------------------------------------------------------------------------------------------------------------------------------------------------------------------------------------------------------------------------------------------------------------------------------------------------------------------------------------------------------------------------------------------------------------------------------------------------|------|
|    | aging" ) AND ALL ( "older age" OR "older adults" OR "older people" ) AND ALL ( intervention OR "RCT" ) ) AND ( LIMIT-TO ( PUBYEAR , 2021 ) OR LIMIT-TO ( PUBYEAR , 2020 ) OR LIMIT-TO ( PUBYEAR , 2019 ) OR LIMIT-TO ( PUBYEAR , 2018 ) OR LIMIT-TO ( PUBYEAR , 2017 ) OR LIMIT-TO ( PUBYEAR , 2016 ) ) AND ( LIMIT-TO ( LANGUAGE , "English" ) OR LIMIT-TO ( LANGUAGE , "Spanish" ) )                                                                                                                                                             |      |
| #6 | ( ALL ( care OR "take care" OR selfcare OR "care of the self" OR "be cared for" ) AND ALL ( "healthy ageing" OR "healthy aging" ) AND ALL ( "older age" OR "older adults" OR "older people" ) AND NOT ALL ( disease OR illness ) ) AND ( LIMIT-TO ( PUBYEAR , 2021 ) OR LIMIT-TO ( PUBYEAR , 2020 ) OR LIMIT-TO ( PUBYEAR , 2019 ) OR LIMIT-TO ( PUBYEAR , 2018 ) OR LIMIT-TO ( PUBYEAR , 2017 ) OR LIMIT-TO ( PUBYEAR , 2016 ) ) AND ( LIMIT-TO ( LANGUAGE , "English" ) OR LIMIT-TO ( LANGUAGE , "Spanish" ) )                                   | 2536 |
| #5 | ( ALL ( care OR "take care" OR selfcare OR "care of the self" OR "be cared for" ) AND ALL ( "healthy ageing" OR "healthy aging" ) AND ALL ( "older age" OR "older adults" OR "older people" ) AND ALL ( intervention OR "RCT" ) AND NOT ALL ( disease OR illness ) ) AND ( LIMIT-TO ( PUBYEAR , 2021 ) OR LIMIT-TO ( PUBYEAR , 2020 ) OR LIMIT-TO ( PUBYEAR , 2019 ) OR LIMIT-TO ( PUBYEAR , 2018 ) OR LIMIT-TO ( PUBYEAR , 2017 ) OR LIMIT-TO ( PUBYEAR , 2016 ) ) AND ( LIMIT-TO ( LANGUAGE , "English" ) OR LIMIT-TO ( LANGUAGE , "Spanish" ) ) | 1234 |
| #4 | ( TITLE-ABS-KEY ( care OR selfcare ) AND TITLE-ABS-KEY ( healthy ) AND TITLE-ABS-KEY ( "old age" OR "older adults" OR aging ) ) AND ( LIMIT-TO ( PUBYEAR , 2021 ) OR LIMIT-TO ( PUBYEAR , 2020 ) OR LIMIT-TO ( PUBYEAR , 2019 ) OR LIMIT-TO ( PUBYEAR , 2018 ) OR LIMIT-TO ( PUBYEAR , 2017 ) OR LIMIT-TO ( PUBYEAR , 2016 ) ) AND ( LIMIT-TO ( LANGUAGE , "English" ) OR LIMIT-TO ( LANGUAGE , "Spanish" ) )                                                                                                                                      | 3367 |
| #3 | ( TITLE-ABS-KEY ( care OR "take care" OR selfcare OR "care of the self" OR "be cared for" ) AND TITLE-ABS-KEY ( "healthy ageing" OR "healthy aging" ) AND TITLE-ABS-KEY ( "older age" OR "older adults" OR "older people" ) AND TITLE-ABS-KEY ( intervention OR "RCT" ) AND NOT TITLE-ABS-KEY ( disease OR illness ) ) AND ( LIMIT-TO ( PUBYEAR , 2021 ) OR LIMIT-TO (                                                                                                                                                                             | 157  |

|                        | PUBYEAR , 2020 ) OR LIMIT-TO ( PUBYEAR , 2019 ) OR LIMIT-TO ( PUBYEAR , 2018 ) OR LIMIT-TO ( PUBYEAR , 2017 ) OR LIMIT-TO ( PUBYEAR , 2016 ) ) AND ( LIMIT-TO ( LANGUAGE , "English" ) OR LIMIT-TO ( LANGUAGE , "Spanish" ) )                                                                                                                                                                                                                                                                                                                           |             |
|------------------------|---------------------------------------------------------------------------------------------------------------------------------------------------------------------------------------------------------------------------------------------------------------------------------------------------------------------------------------------------------------------------------------------------------------------------------------------------------------------------------------------------------------------------------------------------------|-------------|
| #2                     | ( TITLE-ABS-KEY ( care OR "take care" OR selfcare OR "care of the self" OR "be cared for" ) AND TITLE-ABS-KEY ( "healthy ageing" OR "healthy aging" ) AND TITLE-ABS-KEY ( "older age" OR "older adults" OR "older people" ) AND TITLE-ABS-KEY ( intervention OR "RCT" ) ) AND ( LIMIT-TO ( PUBYEAR , 2021 ) OR LIMIT-TO ( PUBYEAR , 2020 ) OR LIMIT-TO ( PUBYEAR , 2019 ) OR LIMIT-TO ( PUBYEAR , 2018 ) OR LIMIT-TO ( PUBYEAR , 2017 ) OR LIMIT-TO ( PUBYEAR , 2016 ) ) AND ( LIMIT-TO ( LANGUAGE , "English" ) OR LIMIT-TO ( LANGUAGE , "Spanish" ) ) | 238         |
| #1                     | ( TITLE-ABS-KEY ( care OR "take care" OR selfcare OR "care of the self" OR "be cared for" ) AND TITLE-ABS-KEY ( "healthy ageing" OR "healthy aging" ) AND TITLE-ABS-KEY ( "older age" OR "older adults" OR "older people" ) ) AND ( LIMIT-TO ( PUBYEAR , 2021 ) OR LIMIT-TO ( PUBYEAR , 2020 ) OR LIMIT-TO ( PUBYEAR , 2019 ) OR LIMIT-TO ( PUBYEAR , 2018 ) OR LIMIT-TO ( PUBYEAR , 2017 ) OR LIMIT-TO ( PUBYEAR , 2016 ) ) AND ( LIMIT-TO ( LANGUAGE , "English" ) OR LIMIT-TO ( LANGUAGE , "Spanish" ) )                                             | 648         |
| <b>Medline queries</b> |                                                                                                                                                                                                                                                                                                                                                                                                                                                                                                                                                         |             |
| Search                 | Query                                                                                                                                                                                                                                                                                                                                                                                                                                                                                                                                                   | Items found |
| #6                     | TX ( care OR selfcare ) AND ( healthy ) AND ( "old age" OR "older adults" OR aging ) Limiters - Date of Publication: 20160101-20211231; Age Related: Aged: 65+ years<br><br>Expanders - Apply equivalent subjects<br><br>Search modes - Boolean/Phrase                                                                                                                                                                                                                                                                                                  | 23838       |
| #5                     | TX ( care OR "take care" OR selfcare OR "care of the self" OR "be cared for" ) AND ( "healthy ageing" OR "healthy                                                                                                                                                                                                                                                                                                                                                                                                                                       | 4016        |

|    |                                                                                                                                                                                                                                                                                          |     |
|----|------------------------------------------------------------------------------------------------------------------------------------------------------------------------------------------------------------------------------------------------------------------------------------------|-----|
|    | aging" ) AND ( "older age" OR "older adults" OR "older people" ) Limiters - Date of Publication: 20160101-20211231; Age Related: Aged: 65+ years                                                                                                                                         |     |
|    | Expanders - Apply equivalent subjects                                                                                                                                                                                                                                                    |     |
|    | Search modes - Boolean/Phrase                                                                                                                                                                                                                                                            |     |
| #4 | AB (care OR "take care" OR selfcare OR "care of the self" OR "be cared for") AND ("healthy ageing" OR "healthy aging") AND ("older age" OR "older adults" OR "older people") AND (intervention OR "RCT") Limiters - Date of Publication: 20160101-20211231; Age Related: Aged: 65+ years | 49  |
|    | Expanders - Apply equivalent subjects                                                                                                                                                                                                                                                    |     |
|    | Search modes - Boolean/Phrase                                                                                                                                                                                                                                                            |     |
| #3 | AB ( care OR selfcare ) AND ( healthy ) AND ( "old age" OR "older adults" OR aging ) Limiters - Date of Publication: 20160101-20211231; Age Related: Aged: 65+ years                                                                                                                     | 513 |
|    | Expanders - Apply equivalent subjects                                                                                                                                                                                                                                                    |     |
|    | Search modes - Boolean/Phrase                                                                                                                                                                                                                                                            |     |
| #2 | AB ( care OR "take care" OR selfcare OR "care of the self" OR "be cared for" ) AND AB ( "healthy ageing" OR "healthy aging" ) AND AB ( "older age" OR "older adults" OR "older people" ) Limiters - Date of Publication: 20160101-20211231; Age Related: Aged: 65+ years                 | 139 |
|    | Expanders - Apply equivalent subjects                                                                                                                                                                                                                                                    |     |
|    | Search modes - Boolean/Phrase                                                                                                                                                                                                                                                            |     |
| #1 | AB ( care OR "take care" OR selfcare OR "care of the self" OR "be cared for" ) AND AB ( "healthy ageing" OR "healthy aging" ) AND AB ( "older age" OR "older adults" OR "older people" ) Limiters - Date of Publication: 20160101-20211231                                               | 280 |
|    | Expanders - Apply equivalent subjects                                                                                                                                                                                                                                                    |     |
|    | Search modes - Boolean/Phrase                                                                                                                                                                                                                                                            |     |

| Cochrane Library queries |                                                                                                                                                                                                                                                                                                                       |             |
|--------------------------|-----------------------------------------------------------------------------------------------------------------------------------------------------------------------------------------------------------------------------------------------------------------------------------------------------------------------|-------------|
| Search                   | Query                                                                                                                                                                                                                                                                                                                 | Items found |
| #4                       | (care OR “take care” OR selfcare OR “care of the self” OR “be cared for”) AND (“healthy ageing” OR “healthy aging”) AND (“older age” OR “older adults” OR “older people”) NOT (disease OR illness) in Full text - with publication date in the Cochrane Library Between Jan 2016 and Dec 2021, in Trials              | 104         |
| #3                       | (care OR “take care” OR selfcare OR “care of the self” OR “be cared for”) AND (“healthy ageing” OR “healthy aging”) AND (“older age” OR “older adults” OR “older people”) in Title Abstract Keyword - with publication date in the Cochrane Library Between Jan 2016 and Dec 2021, in Trials                          | 93          |
| #2                       | (care OR “take care” OR selfcare OR “care of the self” OR “be cared for”) AND (“healthy ageing” OR “healthy aging”) AND (“older age” OR “older adults” OR “older people”) NOT (disease OR illness) in Title Abstract Keyword - with publication date in the Cochrane Library Between Jan 2016 and Dec 2021, in Trials | 84          |
| #1                       | (care OR “take care” OR selfcare OR “care of the self” OR “be cared for”) AND (“healthy ageing” OR “healthy aging”) AND (“older age” OR “older adults” OR “older people”) in Full text - with publication date in the Cochrane Library Between Jan 2016 and Dec 2021                                                  | 112         |
